# Supplementary figures and images for: Insight into Pathogenic Mechanism Underlying the Hereditary Cataract Caused by βB2-G149V Mutation
Source: MDPI journal article supplement (doi:10.3390/biom13050864), 2023-05-19

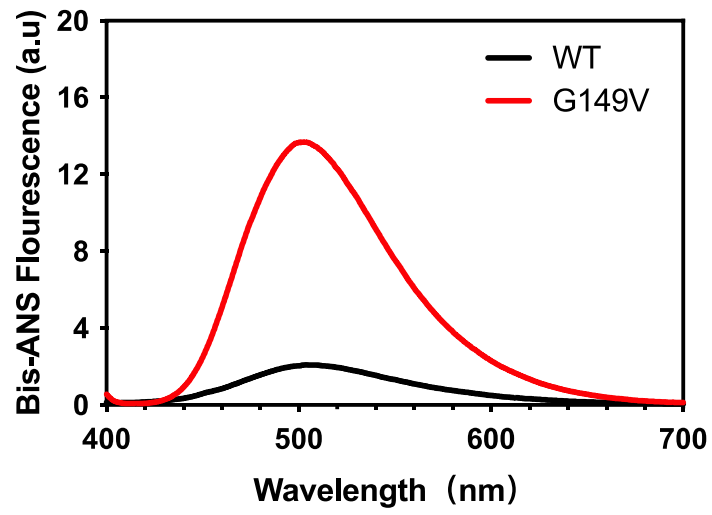

Figure S1. Bis-ANS fluorescence spectra of the  $\beta$ B2-WT and G149V.

Supplement: s1 [file s1]
